# 1 Identification of Genes Regulating Cell Death in *Staphylococcus aureus*

2  
3 Rebecca Yee<sup>a</sup>, Jie Feng<sup>a</sup>, Jiou Wang<sup>b</sup>, Jiazhen Chen<sup>c</sup>, Ying Zhang<sup>a\*</sup>

4  
5 <sup>a</sup>Department of Molecular Microbiology and Immunology, Bloomberg School of Public Health,  
6 Johns Hopkins University, Baltimore, MD

7 <sup>b</sup>Department of Biochemistry and Molecular Biology, Bloomberg School of Public Health,  
8 Johns Hopkins University, Baltimore, MD

9 <sup>c</sup> Department of Infectious Diseases, Huashan Hospital, Fudan University, Shanghai, China

## 10 11 \*Corresponding author:

12  
13 Ying Zhang, MD, PhD  
14 Department of Molecular Microbiology and Immunology,  
15 Bloomberg School of Public Health,  
16 Johns Hopkins University,  
17 Baltimore, MD 21205, USA  
18 Email: yzhang@jhsph.edu

## 19 20 21 Abstract

22  
23 *Staphylococcus aureus* is an opportunistic pathogen that causes acute and chronic infections.  
24 Due to *S. aureus*'s highly resistant and persistent nature, it is paramount to identify better drug  
25 targets in order to eradicate *S. aureus* infections. Despite the efforts in understanding bacterial  
26 cell death, the genes and pathways of *S. aureus* cell death remain elusive. Here, we performed a  
27 genome-wide screen using a transposon mutant library to study the genetic mechanisms involved  
28 in *S. aureus* cell death. Using a precisely controlled heat-ramp and acetic acid exposure assays,  
29 mutations in 27 core genes (*hsdR1*, *hslO*, *nsaS*, *sspA*, *folD*, *mfd*, *vraF*, *kdpB*, USA300HOU\_2684,  
30 0868, 0369, 0420, 1154, 0142, 0930, 2590, 0997, 2559, 0044, 2004, 1209, 0152, 2455, 0154,  
31 2386, 0232, 0350 involved in transporters, transcription, metabolism, peptidases, kinases,  
32 transferases, SOS response, nucleic acid and protein synthesis) caused the bacteria to be more  
33 death-resistant. In addition, we identified mutations in core 10 genes (*capA*, *gltT*, *mmhG1*,  
34 USA300HOU\_1780, 2496, 0200, 2029, 0336, 0329, 2386, involved in transporters, metabolism,  
35 transcription, cell wall synthesis) from heat-ramp and acetic acid that caused the bacteria to be  
36 more death-sensitive or with defect in persistence. Interestingly, death-resistant mutants were  
37 more virulent than the parental strain USA300 and caused increased mortality in a  
38 *Caenorhabditis elegans* infection model. Conversely, death-sensitive mutants were less  
39 persistent and formed less persister cells upon exposure to different classes of antibiotics. These  
40 findings provide new insights into the mechanisms of *S. aureus* cell death and offer new  
41 therapeutic targets for developing more effective treatments caused by *S. aureus*.

42  
43  
44  
45  
46

## 47 **Introduction**

48  
49 *S. aureus* is a major bacterial pathogen that colonizes on the skin of over one-third of the human  
50 population and can cause acute infections such as bacteremia, pneumonia, meningitis and  
51 persistent infections such as osteomyelitis, endocarditis, and biofilm infections such as on  
52 prosthetic implants [1]. Due to emerging resistance and high risk of nosocomial infections and  
53 community-acquired infections, *S. aureus* infections are a major public health concern. To  
54 develop better treatments for *S. aureus* and other bacterial infections, understanding how  
55 bacterial cells die is crucial.

56  
57 By definition, bacteria treated with bactericidal antibiotics, such as the  $\beta$ -lactams, quinolones,  
58 and aminoglycosides, are killed. Much is known about how the drug makes contact with its  
59 target in the bacterial cell.  $\beta$ -lactam antibiotics bind to penicillin binding protein (PBP)  
60 disrupting proper cell wall synthesis; quinolones bind to topoisomerase or gyrase blocking DNA  
61 replication, and aminoglycosides bind to ribosomal proteins resulting in mistranslated proteins  
62 [2-4]. Despite having different drug-target interactions, the downstream effects of drug lethality  
63 of cidal antibiotics are similar. It has been proposed that bacteria treated with cidal antibiotics  
64 have pathways such as SOS response, TCA cycle, ROS formation damaging Fe-S cluster  
65 regardless of the drug target [5, 6], however, the ROS theory of cidal antibiotic lethality has been  
66 challenged as killing of bacteria can still occur in apparently anaerobic conditions that do not  
67 produce ROS [7-9].

68  
69 Mechanisms pertaining to bacterial cell death were mainly characterized in toxin-antitoxin  
70 systems. One of the better characterized Toxin-Antitoxin modules in the context of bacterial cell  
71 death is the MazEF module found in *E. coli* and other species such as *Listeria*, *Enterococcus*,  
72 *Neisseria*, *Streptococcus* and *Mycobacterium* [10-13]. Upon exposure to stresses such as nutrient  
73 depletion, DNA damage, temperature, antibiotics, and oxidative radicals, the MazF antitoxin is  
74 degraded and hence, the MazE toxin can degrade cellular mRNA causing cellular shutdown [10,  
75 12]. In particular to *S. aureus*, the CidA and LrgA proteins, which are holin-like molecules with  
76 analogous functions to apoptotic regulators of the BCL-2 family in eukaryotes, were proposed to  
77 play a role in death and lysis of *S. aureus* [14, 15]. However, the specific process as to how CidA  
78 and LrgA regulate cell death is poorly defined.

79  
80 Although cell death is an important process of a living organism, little is known about the  
81 mechanisms. High-throughput screens have been developed to study the cell death mechanism of  
82 unicellular eukaryotic organisms such as *S. cerevisiae* upon stress signals from high temperature  
83 and acetic acid [16-19], both of which also induce death in bacteria. Here, we performed a high-  
84 throughput genetic screen using a transposon mutant library of USA300 to identify genes  
85 involved in cell death in *S. aureus* [20]. Under multiple death stimuli, we identified 27 genes  
86 whose mutations caused the bacteria to be more death-resistant, while mutations in 10 genes  
87 caused the bacteria to be more death-sensitive.

## 88 89 **Results**

90  
91 *Identification of genes important for cell death resistance*

92 To better understand the mechanisms of cell death, we performed a genetic screen using the  
93 Nebraska Transposon Mutant Library (NTML) which contains mutations in all the non-essential  
94 genes of *S. aureus* USA300, the most common circulating community-acquired MRSA strain in  
95 the United States [20]. To design our assay, we utilized the heat-ramp assay that has been used to  
96 study cell death programs in yeast [17]. To determine viability, we employed both the traditional  
97 agar replica plating for visualization of viable growth on solid media but also stained cells with  
98 SYBR Green I/PI, a viability stain that can detect both live and dead cells [21, 22]. Using a *cidA*  
99 mutant [15] which has been shown to be death-resistant as a control and the parental strain of  
100 USA300 as a death sensitive control, we optimized the condition of our heat-ramp experiment to  
101 show the biggest difference between both the death-resistant and death-sensitive phenotypes  
102 based on agar plating and the live/dead ratio from viability staining with SYBR Green I/PI.

103  
104 For identification of death-resistant mutants, we searched for clones that survive heat-ramp and  
105 grow on agar plating (as opposed to USA300 which no longer show colony growth from replica  
106 plating) and a live/dead ratio that is higher than our death-resistant mutant, *cidA* control. After  
107 the heat-ramp exposure, we identified 74 mutants that were death-resistant. While we cannot  
108 pinpoint a specific gene to be the ultimate regulator of cell death, we generated a list of potential  
109 regulators of cell death. In order to identify core genes and pathways involved in cell death, we  
110 exposed the transposon mutant library to acetic acid stress.

111  
112 Acetic acid has been shown to induce cell death in *S. aureus* and in yeast as well [15, 16, 19, 23].  
113 Upon treatment with acetic acid (6 mM) overnight, 27 (*hsdRI*, *hslO*, *nsaS*, *sspA*, *fold*, *mfd*, *vraF*,  
114 *kdpB*, USA300HOU\_2684, 0868, 0369, 0420, 1154, 0142, 0930, 2590, 0997, 2559, 0044, 2004,  
115 1209, 0152, 2455, 0154, 2386, 0232, 0350) out of the 74 heat-ramp resistant mutants were also  
116 acetic acid resistant (Fig. 1). A majority of the genes identified encode transporters (n=9),  
117 involved in transcription (n=4), metabolism (n=3), peptidases (n=2) and phosphatases & kinases  
118 (n=2). For genes encoding transferases and proteins involved in stress response, nucleic acid  
119 synthesis and protein synthesis, one candidate was found in each category.

120  
121 *Death-resistant strains are more virulent in vivo*

122 Upon infection inside a host, in addition to drug stress, the bacteria are exposed to various types  
123 of stresses such as oxidative stress especially in the phagosomes of immune cells. We then tested  
124 if our death-resistant mutants were more virulent in causing an infection inside the host. After  
125 infection of *C. elegans* with the top 4 death-resistant mutants (*fold*, USA300HOU\_0997, *sspA*,  
126 USA300HOU\_0232) and parental strain USA300, we observed that all four mutants significantly  
127 decreased the survival of the *C. elegans* and killed the worms faster than USA300 (Fig. 2). By 2  
128 days post-infection, the survival of worms infected with our death-resistant mutants had a  
129 survival rate of 36% or lower while worms infected with USA300 had a survival of 50%. The  
130 most virulent strain was Tn::USA300HOU\_0232, a mutation in an iron transporter, as it caused  
131 the greatest mortality in the worms, resulting with only 22% survival of the worms by day 2.  
132 Our data suggest that bacteria that are more death-resistant could potentially cause more serious  
133 infections.

134  
135 *Identification of genes important for cell death sensitivity revealed the importance of glutamate*  
136 *biosynthesis in cell death*

137 In order to fully understand the regulatory networks of cell death pathways, it is crucial to  
138 examine the genes whose mutations cause the cells to be more sensitive to stress as well. Using  
139 the data from our two screens (heat-ramp and acetic acid stress), we adjusted the parameters of  
140 data analysis to distinguish mutants that were cell death sensitive. Unlike the cut-offs mentioned  
141 previously, cell death sensitive mutants were identified as having no viable growth on agar  
142 media and a live/dead ratio that was lower than USA300.

143  
144 Our screen revealed that 92 mutants were hypersensitive to the heat-ramp, of which 10 (*capA*,  
145 *gltT*, *mnhG1*, USA300HOU\_1780, 2496, 0200, 2029, 0336, 0329, 2386) were also sensitive to  
146 acetic acid stress (Fig. 1). Transporters were the more abundant (n=4) followed by genes  
147 involved in metabolism (n=2), and lastly with genes involved in transcription (n=1) and cell wall  
148 synthesis (n=1). Two of the candidates were hypothetical proteins. Interestingly, two  
149 (USA300HOU\_2029, *gltT*) of the top four death-sensitive mutants (USA300HOU\_0329,  
150 USA300HOU\_2029, USA300HOU\_2386, *gltT*) harbored mutations pertaining to glutamate  
151 metabolism.

152  
153 *Death-sensitive strains are less persistent in vitro; strains with mutations involved in glutamate*  
154 *metabolism are the least persistent*

155 One of the reasons why *S. aureus* can cause persistent and recalcitrant infections is due to its  
156 ability to form persister cells. Persisters are dormant cells that are formed during stressed  
157 conditions and upon stress removal, the bacteria can revert back to a growing state and  
158 consequently, cause a relapse in infection [24]. Bacterial persistence can also be viewed as cells  
159 with a strong anti-death program. Given now that we have identified genes whose mutation  
160 renders the bacteria death-sensitive, we then wanted to know if these mutations also lead to  
161 defective in persistence, forming lower amounts of persister cells. Such mutations could then  
162 potentially be drug targets for clearing persistent infections.

163  
164 Persisters are induced by treating stationary phase bacteria with high concentrations of  
165 bactericidal antibiotics (usually at least 10 X MIC). Cells are then washed to rid of stress and  
166 plated on solid medium with no drug for CFU enumeration [25]. We exposed the top 4 death-  
167 sensitive mutants to bactericidal antibiotics with different mechanism of actions: gentamicin,  
168 meropenem, rifampin, and moxifloxacin. Upon 6-days post exposure of antibiotics, all 4 mutants  
169 showed a defect in persistence when exposed to all different classes of antibiotics (Fig. 3). The  
170 amount of persisters is dependent on the type of stress which can be seen here since the absolute  
171 amount of persisters changes among the drugs tested [24]. However, the overall amount of  
172 persister cells formed by the death-sensitive mutants was significantly lower than USA300. The  
173 defect in persistence was the most prominent for gentamicin stress. Under gentamicin stress,  
174 mutations in *gltT* and USA300HOU\_2029, both involved in glutamate metabolism, were  
175 completely killed by 4 day-post exposure while USA300 still had over  $10^7$  CFU/ml. In non-  
176 stressed conditions, no growth defects and decrease in viability of cells were observed.

## 177 178 **Discussion**

179  
180 To our knowledge, this is the first comprehensive study to identify genes and pathways that play  
181 a role in anti-death and pro-death programs in *S. aureus*. These data suggest that not only are  
182 transporters important in regulating cell death pathways in *S. aureus*, but in particular, glutamate

183 metabolism and glutamate transport are important for transformation of a bacteria cell into a both  
184 a more death-resistant and a persistent phenotype under stressed conditions. Our findings show  
185 that mutations in genes involved in intracellular glutamate level regulation such as  
186 USA300HOU\_2029 and *gltT* can decrease cell viability and persistence under antibiotic stresses,  
187 and environmental stresses such as temperature changes (heat-ramp) and low pH (acetic acid).

188  
189 While other studies have searched for cell death genes in *S. aureus* [14, 15, 26, 27], the specific  
190 pathway of glutamate metabolism has never been identified as core cell death proteins. Although  
191 further research is needed to explore how glutamate metabolism plays a protective role in cell  
192 death, hypotheses based on what is currently known about cell death can offer insights into how  
193 intracellular glutamate levels could fit in the program of *S. aureus* cell death. Sadykov et al.  
194 identified that inactivation of the phosphotransacetylase-acetate kinase (Pta-AckA) pathway  
195 which normally generates acetate from acetyl-CoA leads to cell death in *S. aureus* under glucose  
196 and oxygen excess [26]. In bacteria, glutamate fermentation can occur via 3-methylaspartate  
197 which produces pyruvate followed by acetyl-CoA. Considering that acetate can be produced  
198 from acetyl-CoA, our findings may help explain the events that occur upstream of Pta-AckA  
199 activation [28]. Additionally, the lethality induced by cidal antibiotics has been shown to be due  
200 to ROS generation and radical generation from the Fenton reaction suggesting that death  
201 mechanisms result in oxidative responses within the cell [5]. In *Francisella*, glutamate  
202 transporter GadC has been shown to neutralize reactive oxygen species [29]. A study performed  
203 to evaluate the bactericidal effect of CO-releasing molecules (CO-RMs) showed that CO-RMs  
204 stimulated the production of intercellular ROS in the bacteria which was abolished when  
205 glutamate was supplemented to the culture [30]. Thus, increased glutamate levels in the stressed  
206 cells may protect the cell from ROS-mediated cell death under stress.

207  
208 Findings from our previous screens performed to identify genes involved in persistence to  
209 rifampicin [25] showed that genes *gltS*, *gltD*, *gltA*, all of which are involved in glutamate  
210 synthesis, were important. Intriguingly, the protein ArgJ was shown to be a potential core  
211 regulator for *S. aureus* persistence in various stresses (different classes of drugs, heat, and low  
212 pH) [31]. Glutamate is the substrate for ArgJ (Fig. 4) and since mutants with impaired glutamate  
213 biosynthesis and transport showed both death-sensitive and defective persistence phenotypes, it  
214 can be speculated that glutamate can be the main driver of anti-death or equivalent to elevated  
215 persistence programs where arginine synthesis is a potential downstream effector pathway.  
216 Further biochemical studies and metabolomic studies are needed to understand how glutamate  
217 and arginine are involved in cell death.

218  
219 Our screen also identified mutants whose phenotypes are cell death resistant and when the top  
220 four death-resistant mutants were tested in an *in vivo* *C. elegans* model, we found that they are  
221 indeed more virulent than the parental strain USA300 (Fig. 2). The mutant that was the most  
222 virulent harbored a mutation in USA300HOU\_0232 which encodes an iron transporter. Similarly,  
223 the *nsaS* mutant was also identified to be death-resistant from our screens and studies in *S.*  
224 *aureus* have shown that NsaS is part of the cell-envelope two-component sensing system [32, 33].  
225 In a mutant of *nsaS* in *S. aureus*, there is decreased association with metal ions on the cell  
226 surface and as a result, the intracellular concentration of metal ions was reduced [32].  
227 Considering how ROS may play a role in cell death [5], a mutated iron transporter may cause the  
228 cells to be death-resistant by decreasing the amount of ROS inside the cell [34] as the transporter



229 limits the amount of iron needed for the Fenton reaction which can damage DNA and cause cell  
230 death. USA300HOU\_0997 encodes an autolysin family protein that plays a role in peptidoglycan  
231 turnover [35]. Gene expression of autolysins have been implicated in increasing cell wall  
232 stability under stressed conditions [36]. In vancomycin resistant strains, autolysin genes were  
233 downregulated which led to changes in membrane charges and thickness of the cell wall enabling  
234 the cell to survive treatment of cell wall inhibitors [37]. It can be speculated here that decreased  
235 cell division and peptidoglycan turnover in our USA300HOU\_0997 mutant may lead to death  
236 resistance. FoID is a bifunctional protein that allows the production of continuous  
237 tetrahydrofolate which is a key metabolite for amino acid and nucleic acid biosynthesis [38].  
238 The catalytic step of FoID is a checkpoint that regulates folate production [39]. As such, a mutant  
239 of *foID* may disturb the negative feedback of folate synthesis and continuously produce  
240 important metabolites and nucleotides for continued survival under stressed conditions. For  
241 example, MthfR is a Methylenetetrahydrofolate reductase in the same pathway as FoID and has  
242 been shown to be important for growth in *S. aureus* [40]. Lastly, the SspA protein encodes for  
243 the V8 serine protease that cleaves fibronectin binding proteins. Serine proteases such as SspA  
244 are under the *agr* quorum-sensing control operon [41] which coordinates a series of gene  
245 expression cascades to withstand stresses such as oxidative stress and the human immune  
246 response and facilitate bacterial cell growth and pathogenesis [42, 43]. It has been shown that  
247 *agr* negative cells do not undergo cell death as rapidly and were more resistant to cell lysis due to  
248 the increased expression of RNAIII [44, 45]. The increased mortality of *C. elegans* infected with  
249 the SspA mutant suggests that downregulation of *agr* gene could potentially be involved in  
250 causing cell death resistance because *agr*-negative *S. aureus* strains can be found in hosts with  
251 chronic infections and cause infections with increased mortality compared to those infected with  
252 *agr*-positive strains [46].

253  
254 Interestingly, our screen revealed that mutants of *hslO* and *mfd* were more death-resistant which  
255 may appear contradictory given that expression of HslO and Mfd are protective for the cell  
256 during stress [47, 48]. HslO (or Hsp33) has been shown to be upregulated especially during  
257 oxidative stress and that HslO levels were decreased when *S. aureus* cells were transitioning to  
258 slow/non-growing status [49]. It is well known that Mfd is involved in prevent DNA damage  
259 from oxidative stress, immune response, and drugs [47, 50]. Decreased expression of Mfd in *S.*  
260 *aureus* led to decreased biofilm formation [51] and a *mfd* mutant of *C. difficile* has increased  
261 toxin production [52]. For *B. subtilis*, Mfd-deficient cells formed less endospores [53] and  
262 resulted in a 35-fold overexpression of OhrR, a transcription factor involved in peroxide stress  
263 response [54]. Given that Mfd has many nonconical roles, we speculate that under stressed  
264 conditions decrease of expression in our *mfd* mutant may allow expression of another  
265 transcription factor (such as the OhrR) to activate stress response pathways. It is also possible  
266 that the contradictory phenotypes of the *hslO* and *mfd* mutants are due to compensatory  
267 mutations in the *hslO* and *mfd* mutants, which are known to occur in loss of function mutants in  
268 yeast [55].

269  
270 As with any mutant library, secondary mutations may have occurred in some mutants that  
271 could affect the phenotypic outcomes. For example, our speculation as to why a *hsdR* mutant is  
272 more death-resistant could also be associated to the genetic background of the mutant.  
273 Inactivation of HsdR, an endonuclease of the type 1 restriction system in *S. aureus*, allowed *S.*  
274 *aureus* to become readily transformable due to decreased cleavage of foreign DNA [56, 57]. In

275 our *hsdR* mutant, it could be possible that secondary mutations or genetic modifications have  
276 occurred in the genome that caused the death-resistant phenotype. While we performed whole  
277 genome sequencing on our mutant clones to confirm the location of the transposon, the  
278 possibility of secondary mutations playing a role in the phenotypes observed here have yet to be  
279 explored. However, we performed the screen twice followed by individual confirmation. The  
280 same subculture from the same stock was also used each time to ensure reproducibility among  
281 all replicates. Meanwhile, even if there is a secondary mutation, the decreased expression of  
282 the specific genes identified here due to the transposon insertion would still be a valid part of  
283 the mechanisms of cell death.

284  
285 Our work adapted assays that are used in the yeast community to identify genes involved in yeast  
286 cell death [16-19]. In the high-throughput screen consisting of yeast mutants and even in yeast  
287 strains of different backgrounds, categories of genes that were redundant among the studies  
288 include carbohydrate metabolism, transcription factors, and ion transport [18, 58, 59].  
289 Interestingly, amino acid transport was the most significantly enriched term for genes involved in  
290 positive regulation of acetic acid-induced death; two of the identified transporters were involved  
291 in metabolism of glutamate (GDH1 and GDH2) [18]. A similar approach of a “heat-ramp” stress  
292 was used in one study on *B. subtilis* using a water bath [60]. Their study revealed that heat shock  
293 proteins, sporulation, competence, and carbon metabolism were important. While we did not  
294 identify similar genes, carbon metabolism was identified in both our screens. Heat shock proteins  
295 were heavily enriched in their study but not ours which can be attributed to the candidates in our  
296 library which only contain mutants of non-essential genes and only 2 candidates out of 1,952  
297 were heat shock proteins [61].

298  
299 Despite the significant findings of this study, there are some limitations. First, while we  
300 generated a list of the mutants that are death-sensitive and death-resistant to both heat ramp  
301 and acetic acid stress, the screens performed here are only a snapshot of what is happening in  
302 the cell. The phenotypes seen here were determined by the condition of our assays and can be  
303 affected by the level of stress (e.g. concentration of the acetic acid, ramping time and  
304 temperature for the heat ramp) [17]. Although we included both a wild type USA300 strain  
305 and a CidA mutant, a known death-resistant mutant [15, 62], to optimize our conditions, it is  
306 important to recognize that our screen may not be comprehensive in finding all the mediators  
307 of cell death. While our goal was more conservative and was to search for core regulators, the  
308 significant role of other genes and pathways involved in cell death that were not classified as  
309 core regulators should not be undermined. Our screen only explored cell death at the DNA  
310 level and further protein studies would provide more comprehensive insight into the effects of  
311 gene transposon insertions in regulating cell death. Even though this mutant library contained  
312 all the non-essential genes in USA300, we cannot overrule the fact that cell death is an  
313 important program for any living organism and cell death regulators may be essential genes  
314 which are not included in our library.

315  
316 Given that we know the killing activity of antibiotics extend beyond the drug-target interactions  
317 [5], understanding the effector proteins and downstream events of bacterial cell death can help  
318 provide novel drug treatment approaches for bacterial infections. For example, cell death can be  
319 artificially induced by disruption of the negative regulator of cell death in a similar fashion to  
320 how apoptotic pathways are exploited to treat cancer cells. Recently, it was shown that

321 extracellular death peptides from both *E. coli* and *P. aeruginosa* can induce toxic  
322 endoribonucleolytic activities of MazEF in *M. tuberculosis* suggesting promising therapeutic  
323 outcomes upon manipulation of the cell death mediators in bacteria [63]. Similarly, since ROS  
324 formation serves an important role in the lethality of cidal antibiotics, a drug combination with  
325 metabolic perturbations may enhance killing of currently used antibiotics. For example, causing  
326 defects in peroxide-detoxifying enzymes have been shown to increase antimicrobial lethality  
327 [64]. On the other hand, it is of concern that more than half of the population in the US  
328 consumes nutritional supplements such as vitamins which are antioxidants [65] and the potential  
329 antagonistic effects of an antioxidant diet in a patient taking antibiotics will require further  
330 investigation.

331  
332 In conclusion, we report the molecular basis of cell death in *S. aureus*. To our knowledge, this  
333 is the first report on identification of *S. aureus* cell death genes from a whole genome  
334 perspective. Our extensive screen also offers insights to common core mechanisms that are  
335 relevant to not only cell death but bacterial persistence, a phenomenon that's at the core of  
336 recalcitrant infections and biofilm formations. Our studies provide insights to possible new  
337 drugable targets, biomarkers for recalcitrant infections for diagnostic purposes and novel  
338 vaccine targets for prevention of bacterial infections. The similarity in functional groups  
339 found between our study and other yeast studies suggest that our work also sheds light into  
340 cell death pathways of eukaryotic systems such as pathogenic fungi and cancer stem cells.

341

## 342 **Methods**

343

### 344 *Culture Media, Antibiotics, and Chemicals*

345 Meropenem, moxifloxacin, rifampicin, gentamicin, and erythromycin were obtained from  
346 Sigma-Aldrich Co. (St. Louis, MO, USA). Stock solutions were prepared in the laboratory,  
347 filter-sterilized and used at indicated concentrations. Bacterial strains used in this study  
348 include USA300 and the Nebraska-Transposon Mutant Library (NTML) [20]. *S.*  
349 *aureus* strains were cultured in tryptic soy broth (TSB) and tryptic soy agar (TSA) with the  
350 appropriate antibiotics and growth conditions. Transposon-insertion mutants grew in  
351 erythromycin (50 µg/ml), the antibiotic selective marker.

352

### 353 *Genetic Screen to identify cell death mutants*

354 For the heat-ramp, we performed the assay as described [17]. Briefly, we normalized the  
355 concentration of the bacteria to OD<sub>600</sub>= 0.5 using PBS as the diluent. Then, we placed the  
356 samples in the thermocycler with a protocol following: 30°C for 1 minute, ramp from 30 °C to  
357 62 °C with a step-interval of 0.5 °C per 30 seconds. For acid stress, acetic acid (6 mM) were  
358 added into stationary phase cultures and incubated overnight. To enumerate for cell counts,  
359 the mutant library was replica transferred to TSA plates to score for mutants that failed to  
360 grow after stress. For viability staining, SYBR Green I/PI staining was performed as  
361 described [21, 22]. SYBR Green I (10,000× stock, Invitrogen) was mixed with PI (20 µM,  
362 Sigma) in distilled H<sub>2</sub>O with a ratio of 1:3 (SYBR Green I to PI) in 100 µl distilled H<sub>2</sub>O and  
363 stained for 30 minutes in room temperature. Prior to the heat-ramp, the SYBR Green I/PI dye  
364 was added to the bacteria as the heat-ramp impaired the uptake of the dye. For the acetic acid  
365 stress, the dyes were added at the end of the exposure [17]. The green and red fluorescence  
366 intensity was detected using a Synergy H1 microplate reader by BioTek Instruments (VT, USA)



367 at excitation wavelength of 485 nm and 538 nm and 612 nm for green and red emission,  
368 respectively. The live/dead ratio was calculated by dividing the green/red fluorescence.

369

#### 370 *Persistor Assays*

371 Selected drugs were added to overnight stationary phase cultures for 6 days. At the selected  
372 time points, bacterial cultures were washed with 1 X PBS to remove stress, serially diluted,  
373 and plated onto TSA with no drugs for cell enumeration [25].

374

#### 375 *Nematode-killing Assay*

376 *C. elegans* N2 Bristol worms (Caenorhabditis Genetics Center) were synchronized to the same  
377 growth stage by treatment with alkaline hypochlorite solution as described [66]. Worms of adult  
378 stage were washed and suspended in bleaching solution with 5% hypochlorite for 9 minutes to  
379 lyse all the adult stages but keeping the eggs intact. Bleach was removed by centrifugation at  
380 1,500 rpm for 1 minute and washed three times with M9 buffer. The pellet was incubated in M9  
381 buffer at 20 °C with gentle agitation and proper aeration. L4 stage adult worms were obtained  
382 after 48 hours at 20 °C. For each assay, 20-30 worms were added to liquid M9 buffer  
383 supplemented with 5-Fluoro-2'-deoxyuridine (10 μM) to inhibit progeny formation. *S. aureus*  
384 (10<sup>6</sup> CFU) that were grown overnight at 30 °C in TSB containing the appropriate antibiotics as  
385 needed were added into the buffer containing the worms. The samples were scored for live  
386 and dead worms every 24 hours.

387

#### 388 *Acknowledgements*

389 We gratefully acknowledge BEI Resources for provision of the NTML mutant library. We thank  
390 Zachary Stolp and Marie Hardwick for helpful discussions regarding the heat-ramp experiment.  
391 RY was supported by NIH training grant T32 AI007417.

392

393

394

395

396

397

398

399

400

401

402

403

404

405

406

407

408

409

410

411

412

413

414 A.

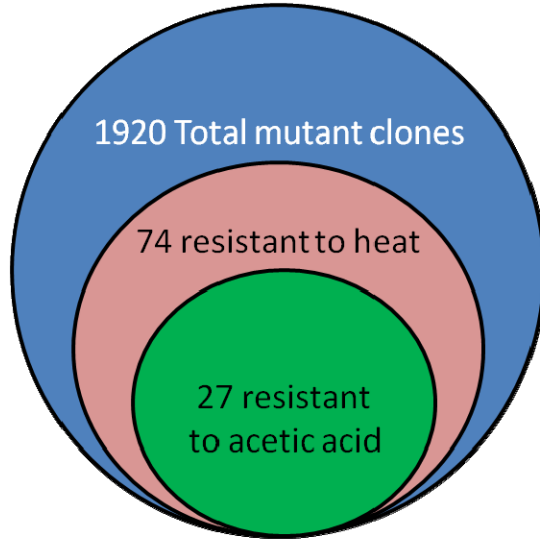

B.

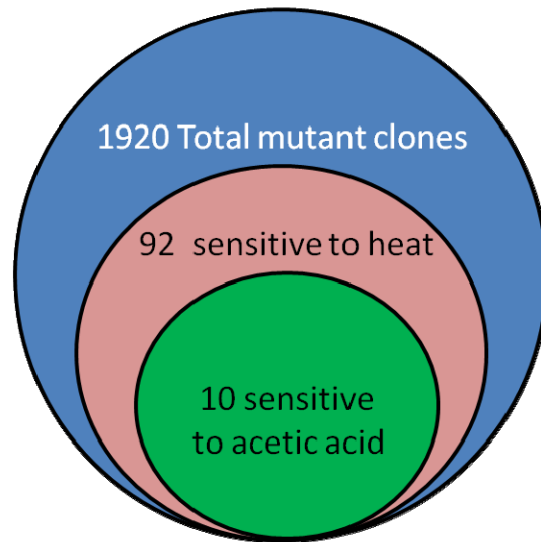

415

416 C.

417

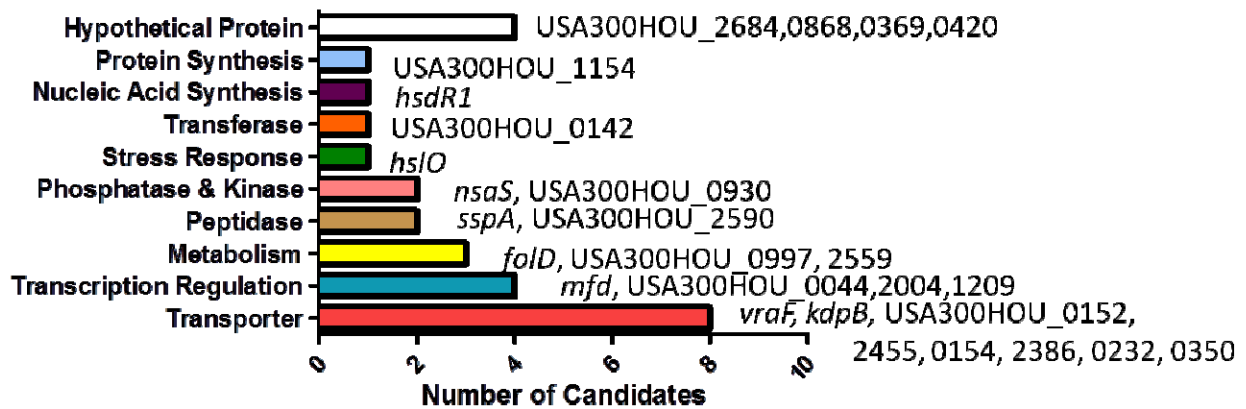

418

419 D.

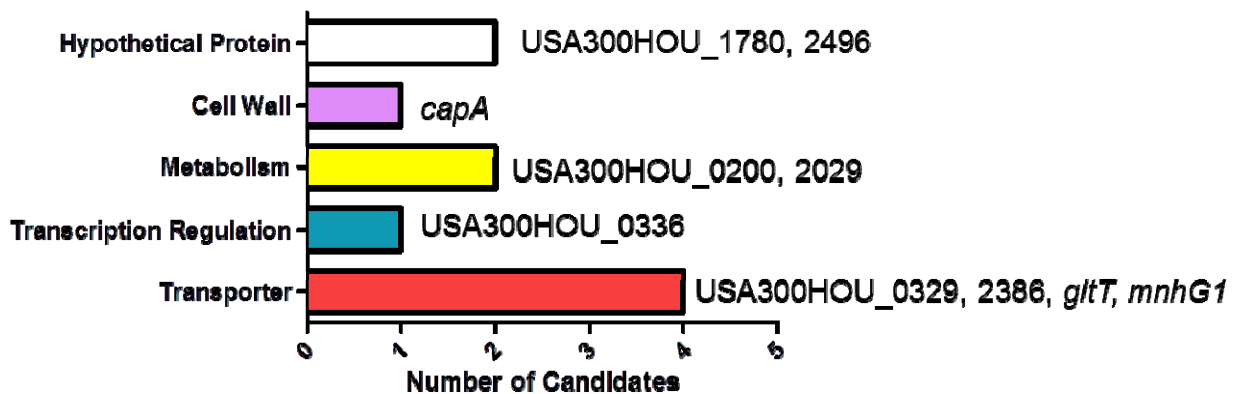

420

421 **Figure 1.** Identification of genes involved in causing bacterial cell death-resistance and cell  
422 death-sensitivity. (A) Summary of the number of candidates identified from the Nebraska  
423 Transposon Mutant Library (NTML) as being more death-resistant (A) and death-sensitive (B) in  
424 heat-ramp and acetic acid stress. The breakdown of the respective categories of genes whose  
425 mutations cause death-resistance (C) and death-sensitivity (D) to both stresses.

426  
427  
428  
429  
430  
431  
432  
433  
434

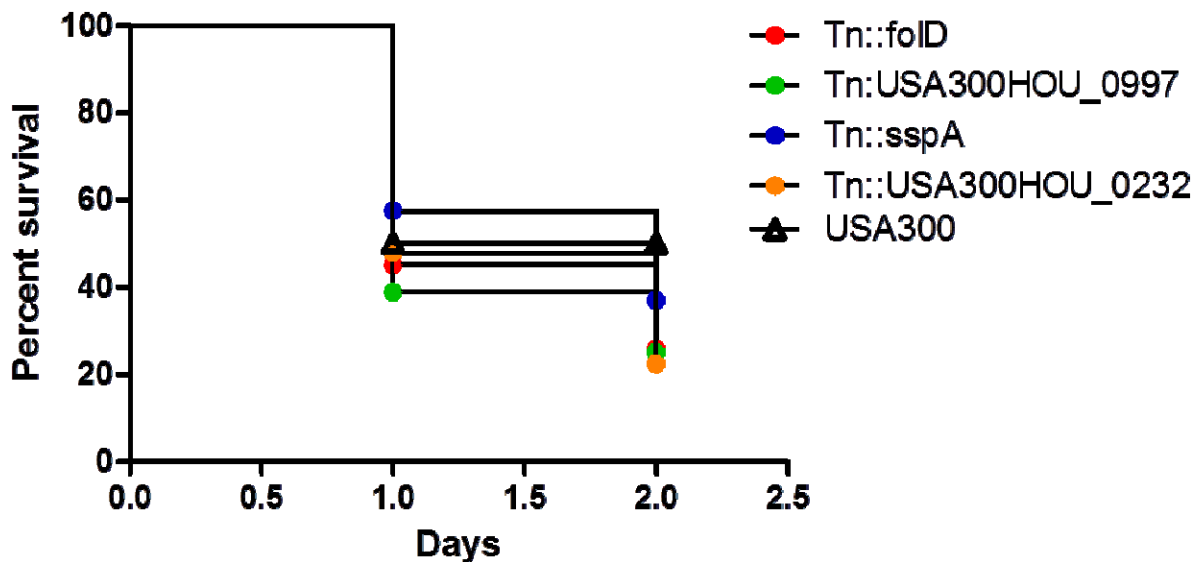

435  
436 **Figure 2.** Strains that are more death-resistant caused more virulent infections in *C. elegans*.  
437 *C. elegans* (n=20-30) infected ( $10^6$  CFU) with mutants showing resistance to cell death showed  
438 increased mortality than *C. elegans* infected with parental strain USA300.

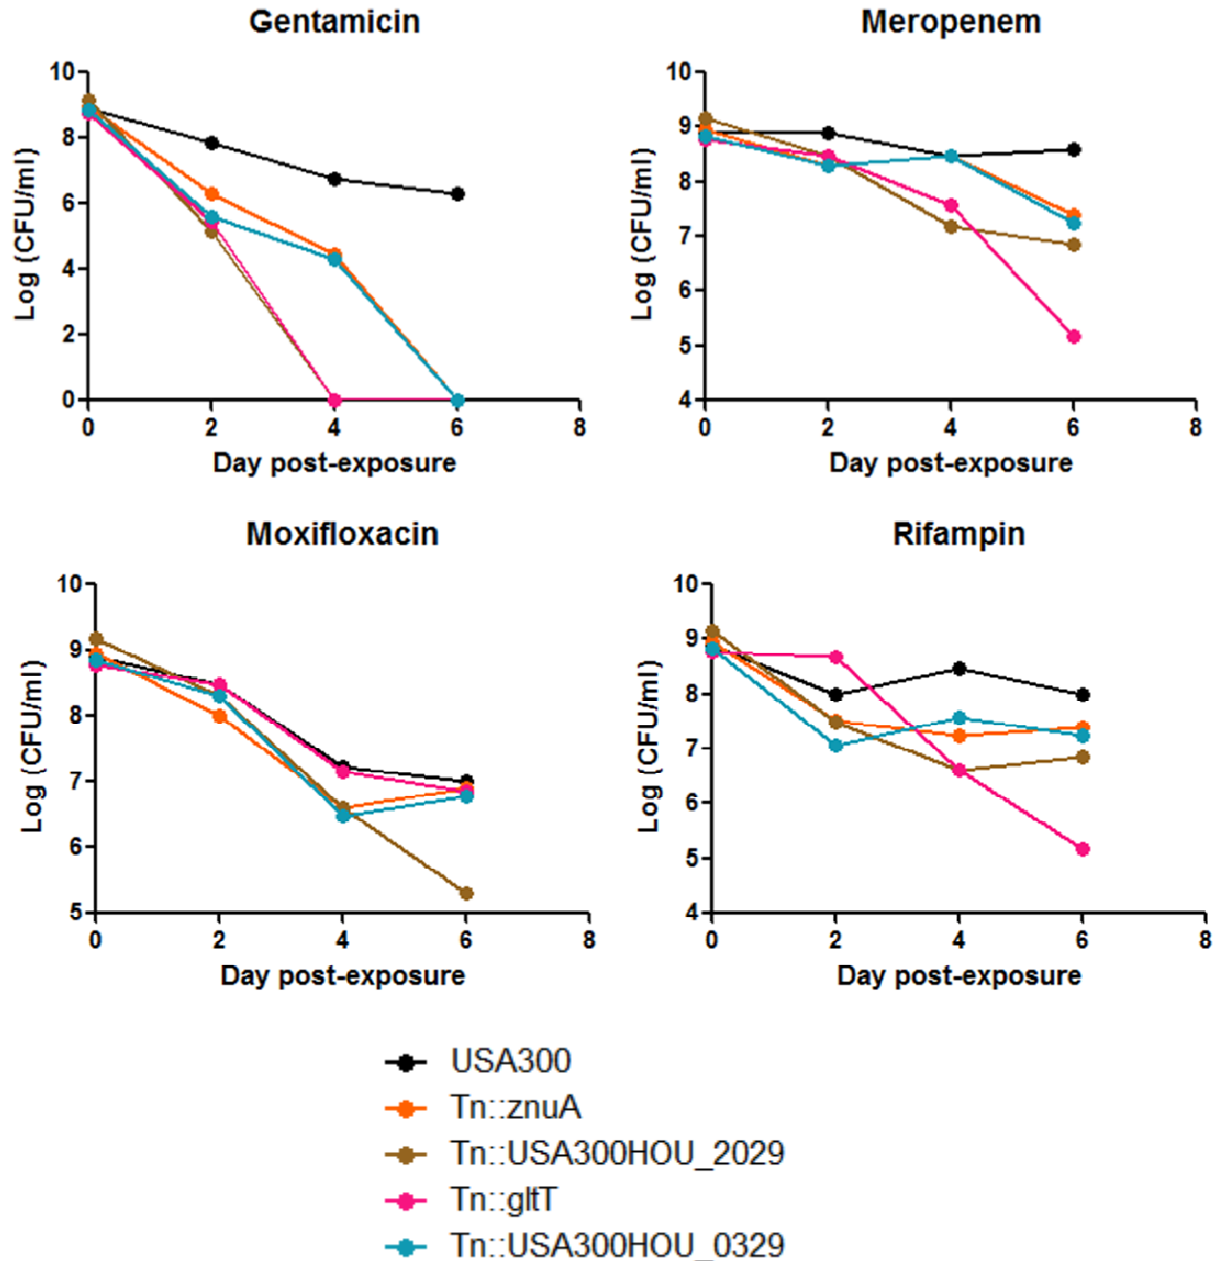

439

440

441 **Figure 3.** Strains that are more death-sensitive also show decreased persistence to bactericidal  
442 antibiotics. Mutants that were more cell-death sensitive showed defective persistence to  
443 gentamicin (60  $\mu$ g/ml), meropenem (20  $\mu$ g/ml), moxifloxacin (40  $\mu$ g/ml), and rifampin (2  $\mu$ g/ml)  
444 upon prolonged drug exposure up to 6 days.

445

446

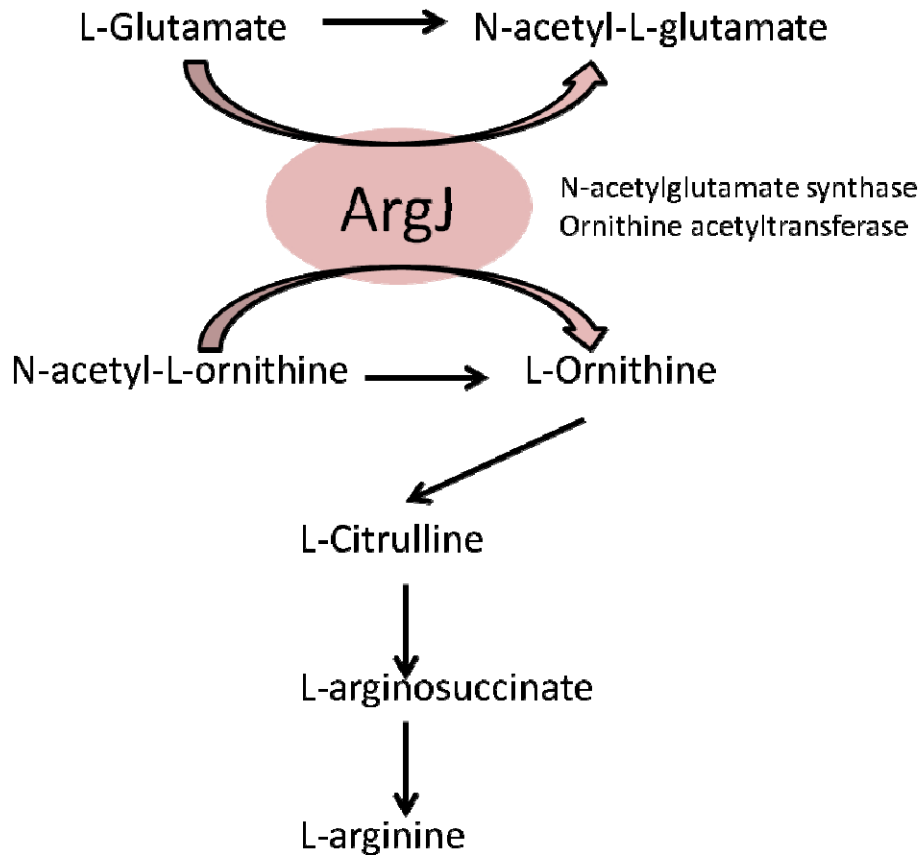

447  
448  
449  
450  
451  
452  
453  
454  
455  
456  
457  
458  
459  
460  
461  
462  
463  
464  
465  
466  
467  
468  
469

**Figure 4.** Proposed model of cell-death pathway through glutamate and arginine metabolism



470  
471  
472

**Table 1.** Top 4 genes whose mutations result in resistance to cell death in both heat-ramp and acetic acid stress

| <b>Accession Number</b> | <b>Gene Name (if applicable)</b> | <b>Function</b>                                                                                         | <b>KEGG Ontology</b>                                                                                                               |
|-------------------------|----------------------------------|---------------------------------------------------------------------------------------------------------|------------------------------------------------------------------------------------------------------------------------------------|
| USA300HOU_1008          | <i>folD</i>                      | Methylenetetrahydrofolate dehydrogenase; methenyltetrahydrofolate cyclohydrolase                        | Metabolism of cofactors and vitamins; One carbon pool by folate                                                                    |
| USA300HOU_0997          |                                  | Bifunctional N-acetylmuramoyl-L-alanine amidase/mannosyl-glycoprotein endo-beta-N-acetylglucosaminidase | Metabolism                                                                                                                         |
| USA300HOU_0996          | <i>sspA</i>                      | Glutamyl endopeptidase                                                                                  | Cellular community prokaryotes; Quorum sensing; Serine Peptidases of chymotrypsin family                                           |
| USA300HOU_0232          |                                  | Iron ABC transporter membrane binding protein                                                           | Environmental Information Processing; Membrane transport; ABC transporters; Mineral and organic ion transporters; Iron transporter |

473  
474  
475  
476  
477  
478  
479  
480  
481  
482  
483  
484  
485  
486  
487  
488

489 **Table 2.** Top 4 genes whose mutations result in sensitivity to cell death in both heat-ramp and  
490 acetic acid stress

| Accession Number | Gene name (if applicable) | Function                                        | KEGG Ontology                                                                                                                               |
|------------------|---------------------------|-------------------------------------------------|---------------------------------------------------------------------------------------------------------------------------------------------|
| USA300HOU_0329   |                           | ABC transporter-ATP binding protein             | Protein families: Signaling and cellular processes; Transporters                                                                            |
| USA300HOU_2029   |                           | Amidohydrolase                                  | Metabolism: Amino acid metabolism; Alanine, aspartate and glutamate metabolism                                                              |
| USA300HOU_2386   | <i>znuA</i>               | Zinc transport system substrate-binding protein | Environmental Information Processing; Membrane transport; Metallic cation, iron- siderophore and vitamin B12 transporters; Zinc transporter |
| USA300HOU_2366   | <i>gltT, gltP</i>         | Proton glutamate symport protein                | Protein families: Signaling and cellular processes; Electrochemical potential-driven transporters                                           |

491  
492  
493  
494  
495  
496  
497  
498  
499  
500  
501  
502  
503  
504  
505  
506  
507  
508

509 **Supplementary Table 1.** Genes whose mutations resulted in cell death resistance to both heat-  
 510 ramp stress and acetic acid stress

|                                   | <b>Gene name<br/>(if<br/>applicable)</b> | <b>Function</b>                                                                                             | <b>Accessory Number</b> |
|-----------------------------------|------------------------------------------|-------------------------------------------------------------------------------------------------------------|-------------------------|
| <b>Transporters</b>               |                                          |                                                                                                             |                         |
|                                   | <i>vraF</i>                              | ABC transporter ATP-binding protein                                                                         | USA300HOU_0682          |
|                                   | <i>kdpB</i>                              | Potassium-transporting ATPase subunit B                                                                     | USA300HOU_2071          |
|                                   |                                          | ABC transporter ATP-binding protein                                                                         | USA300HOU_0152          |
|                                   |                                          | Oligopeptide ABC transporter ATP-binding protein                                                            | USA300HOU_2455          |
|                                   |                                          | ABC transporter ATP-binding protein                                                                         | USA300HOU_0154          |
|                                   |                                          | Iron ABC transporter membrane binding protein                                                               | USA300HOU_0232          |
|                                   |                                          | PTS system ascorbate-specific transporter subunit IIC                                                       | USA300HOU_0350          |
|                                   |                                          | ABC transporter ATP-binding protein                                                                         | USA300HOU_2386          |
| <b>Transcription Regulators</b>   |                                          |                                                                                                             |                         |
|                                   | <i>mfd</i>                               | Transcription-repair coupling factor                                                                        | USA300HOU_0497          |
|                                   |                                          | Transcription regulator                                                                                     | USA300HOU_0044          |
|                                   |                                          | Transcription regulator                                                                                     | USA300HOU_2004          |
|                                   |                                          | GntR family transcription regulator                                                                         | USA300HOU_1209          |
| <b>Peptidases</b>                 |                                          |                                                                                                             |                         |
|                                   | <i>sspA</i>                              | Glutamyl endopeptidase                                                                                      | USA300HOU_0996          |
|                                   |                                          | Peptidase                                                                                                   | USA300HOU_2590          |
| <b>Metabolism</b>                 |                                          |                                                                                                             |                         |
|                                   | <i>fold</i>                              | Methylenetetrahydrofolate dehydrogenase;<br>Methenyltetrahydrofolate cyclohydrolase                         | USA300HOU_1008          |
|                                   |                                          | Bifunctional N-acetylmuramoyl-L-alanine amidase,<br>Mannosyl-glycoprotein endo-beta-N-acetylglucosaminidase | USA300HOU_0997          |
|                                   |                                          | Phytoene dehydrogenase                                                                                      | USA300HOU_2559          |
| <b>Phosphatases &amp; Kinases</b> |                                          |                                                                                                             |                         |
|                                   | <i>nsaS</i>                              | Nisin susceptibility-associated sensor histidine kinase                                                     | USA300HOU_2623          |
|                                   |                                          | HAD family phosphatase                                                                                      | USA300HOU_0930          |
| <b>Transferases</b>               |                                          |                                                                                                             |                         |
|                                   |                                          | Glycosyltransferase                                                                                         | USA300HOU_0142          |

|                               |              |                                                                      |                |
|-------------------------------|--------------|----------------------------------------------------------------------|----------------|
| <b>Stress Response</b>        |              |                                                                      |                |
|                               | <i>hslO</i>  | Hsp33-like chaperonin                                                | USA300HOU_0506 |
| <b>Nucleic Acid Synthesis</b> |              |                                                                      |                |
|                               | <i>hsdRI</i> | Type I site-specific deoxyribonuclease restriction subunit           | USA300HOU_0033 |
| <b>Protein Synthesis</b>      |              |                                                                      |                |
|                               | <i>rsmB</i>  | rRNA (cytosine-5-)-methyltransferase                                 | USA300HOU_1154 |
|                               |              | Acetyltransferases [Translation, ribosomal structure and biogenesis] | USA300HOU_2684 |
| <b>Hypothetical Proteins</b>  |              |                                                                      |                |
|                               |              |                                                                      | USA300HOU_0868 |
|                               |              |                                                                      | USA300HOU_0369 |
|                               |              |                                                                      | USA300HOU_0420 |

511  
512  
513  
514  
515  
516  
517  
518  
519  
520  
521  
522  
523  
524  
525  
526  
527  
528  
529  
530  
531  
532  
533  
534  
535  
536  
537  
538

539 **Supplementary Table 2.** Genes whose mutations resulted in more cell death after heat-ramp  
540 and acetic acid stress

|                              | <b>Gene name<br/>(if<br/>applicable)</b> | <b>Function</b>                              | <b>Accessory Number</b> |
|------------------------------|------------------------------------------|----------------------------------------------|-------------------------|
| <b>Transporters</b>          |                                          |                                              |                         |
|                              | <i>glfT</i>                              | Proton glutamate symport protein             | USA300HOU_2366          |
|                              | <i>mnhG1</i>                             | Monovalent cation antiporter subunit G       | USA300HOU_0649          |
|                              |                                          | ABC transporter ATP-binding protein          | USA300HOU_0329          |
|                              |                                          | ABC transporter ATP-binding protein          | USA300HOU_2386          |
| <b>Metabolism</b>            |                                          |                                              |                         |
|                              |                                          | Isochorismatase                              | USA300HOU_0200          |
|                              |                                          | Amidohydrolase                               | USA300HOU_2029          |
| <b>Transcription</b>         |                                          |                                              |                         |
|                              |                                          | Transcription regulator                      | USA300HOU_0336          |
| <b>Cell wall</b>             |                                          |                                              |                         |
|                              | <i>capA</i>                              | Capsular polysaccharide biosynthesis protein | USA300HOU_2664          |
| <b>Hypothetical Proteins</b> |                                          |                                              |                         |
|                              |                                          |                                              | USA300HOU_1780          |
|                              |                                          |                                              | USA300HOU_2496          |

541  
542  
543  
544  
545  
546  
547  
548  
549  
550  
551  
552  
553  
554  
555  
556  
557  
558  
559  
560



561 **References**

- 562
- 563 1. Tong, S.Y., et al., *Staphylococcus aureus* infections: epidemiology, pathophysiology, clinical  
564 manifestations, and management. Clin Microbiol Rev, 2015. **28**(3): p. 603-61.
  - 565 2. Drlica, K., et al., *Quinolone-mediated bacterial death*. Antimicrob Agents Chemother, 2008. **52**(2):  
566 p. 385-92.
  - 567 3. Arthur, M. and P. Courvalin, *Genetics and mechanisms of glycopeptide resistance in enterococci*.  
568 Antimicrob Agents Chemother, 1993. **37**(8): p. 1563-71.
  - 569 4. Davis, B.D., *Mechanism of bactericidal action of aminoglycosides*. Microbiol Rev, 1987. **51**(3): p.  
570 341-50.
  - 571 5. Kohanski, M.A., et al., *A common mechanism of cellular death induced by bactericidal antibiotics*.  
572 Cell, 2007. **130**(5): p. 797-810.
  - 573 6. Kohanski, M.A., D.J. Dwyer, and J.J. Collins, *How antibiotics kill bacteria: from targets to*  
574 *networks*. Nat Rev Microbiol, 2010. **8**(6): p. 423-35.
  - 575 7. Liu, Y. and J.A. Imlay, *Cell death from antibiotics without the involvement of reactive oxygen*  
576 *species*. Science, 2013. **339**(6124): p. 1210-3.
  - 577 8. Keren, I., et al., *Killing by bactericidal antibiotics does not depend on reactive oxygen species*.  
578 Science, 2013. **339**(6124): p. 1213-6.
  - 579 9. Malik, M., S. Hussain, and K. Drlica, *Effect of anaerobic growth on quinolone lethality with*  
580 *Escherichia coli*. Antimicrob Agents Chemother, 2007. **51**(1): p. 28-34.
  - 581 10. Amitai, S., et al., *Escherichia coli MazF leads to the simultaneous selective synthesis of both*  
582 *"death proteins" and "survival proteins"*. PLoS Genet, 2009. **5**(3): p. e1000390.
  - 583 11. Engelberg-Kulka, H., et al., *Bacterial programmed cell death and multicellular behavior in*  
584 *bacteria*. PLoS Genet, 2006. **2**(10): p. e135.
  - 585 12. Engelberg-Kulka, H. and G. Glaser, *Addiction modules and programmed cell death and antideath*  
586 *in bacterial cultures*. Annu Rev Microbiol, 1999. **53**: p. 43-70.
  - 587 13. Zhu, L., et al., *Characterization of mRNA interferases from Mycobacterium tuberculosis*. J Biol  
588 Chem, 2006. **281**(27): p. 18638-43.
  - 589 14. Groicher, K.H., et al., *The Staphylococcus aureus lrgAB operon modulates murein hydrolase*  
590 *activity and penicillin tolerance*. J Bacteriol, 2000. **182**(7): p. 1794-801.
  - 591 15. Rice, K.C., et al., *The Staphylococcus aureus cidAB operon: evaluation of its role in regulation of*  
592 *murein hydrolase activity and penicillin tolerance*. J Bacteriol, 2003. **185**(8): p. 2635-43.
  - 593 16. Teng, X. and J.M. Hardwick, *Reliable method for detection of programmed cell death in yeast*.  
594 Methods Mol Biol, 2009. **559**: p. 335-42.
  - 595 17. Teng, X. and J.M. Hardwick, *Quantification of genetically controlled cell death in budding yeast*.  
596 Methods Mol Biol, 2013. **1004**: p. 161-70.
  - 597 18. Sousa, M., et al., *Genome-wide identification of genes involved in the positive and negative*  
598 *regulation of acetic acid-induced programmed cell death in Saccharomyces cerevisiae*. BMC  
599 Genomics, 2013. **14**: p. 838.
  - 600 19. Ludovico, P., et al., *Saccharomyces cerevisiae commits to a programmed cell death process in*  
601 *response to acetic acid*. Microbiology, 2001. **147**(Pt 9): p. 2409-15.
  - 602 20. Fey, P.D., et al., *A genetic resource for rapid and comprehensive phenotype screening of*  
603 *nonessential Staphylococcus aureus genes*. MBio, 2013. **4**(1): p. e00537-12.
  - 604 21. Feng, J., et al., *An optimized SYBR Green I/PI assay for rapid viability assessment and antibiotic*  
605 *susceptibility testing for Borrelia burgdorferi*. PloS one, 2014. **9**(11): p. e111809.
  - 606 22. Feng, J., et al., *A Rapid Growth-Independent Antibiotic Resistance Detection Test by SYBR*  
607 *Green/Propidium Iodide Viability Assay*. Front Med (Lausanne), 2018. **5**: p. 127.

- 608 23. Windham, I.H., et al., *SrrAB Modulates Staphylococcus aureus Cell Death through Regulation of*  
609 *cidABC Transcription*. J Bacteriol, 2016. **198**(7): p. 1114-22.
- 610 24. Zhang, Y., *Persisters, Persistent Infections and the Yin-Yang Model*. Emerging Microbes and  
611 Infection, 2014. **3**: p. 10.
- 612 25. Yee, R., et al., *Genetic Screen Reveals the Role of Purine Metabolism in Staphylococcus aureus*  
613 *Persistence to Rifampicin*. Antibiotics, 2015. **4**(4): p. 627.
- 614 26. Sadykov, M.R., et al., *Inactivation of the Pta-AckA pathway causes cell death in Staphylococcus*  
615 *aureus*. J Bacteriol, 2013. **195**(13): p. 3035-44.
- 616 27. Rice, K.C. and K.W. Bayles, *Death's toolbox: examining the molecular components of bacterial*  
617 *programmed cell death*. Mol Microbiol, 2003. **50**(3): p. 729-38.
- 618 28. Herrmann, G., et al., *Energy conservation via electron-transferring flavoprotein in anaerobic*  
619 *bacteria*. J Bacteriol, 2008. **190**(3): p. 784-91.
- 620 29. Ramond, E., et al., *Glutamate utilization couples oxidative stress defense and the tricarboxylic*  
621 *acid cycle in Francisella phagosomal escape*. PLoS Pathog, 2014. **10**(1): p. e1003893.
- 622 30. Tavares, A.F., et al., *Reactive oxygen species mediate bactericidal killing elicited by carbon*  
623 *monoxide-releasing molecules*. J Biol Chem, 2011. **286**(30): p. 26708-17.
- 624 31. Yee, R., Cui, P., Xu, T., Shi, W., Feng, J., Zhang, W., Zhang, Y., *Identification of a Novel Gene argJ*  
625 *involved in Arginine Biosynthesis Critical for Persister Formation in Staphylococcus aureus*.  
626 bioRxiv, 2017.
- 627 32. Kolar, S.L., et al., *NsaRS is a cell-envelope-stress-sensing two-component system of*  
628 *Staphylococcus aureus*. Microbiology, 2011. **157**(Pt 8): p. 2206-19.
- 629 33. Blake, K.L., C.P. Randall, and A.J. O'Neill, *In vitro studies indicate a high resistance potential for*  
630 *the lantibiotic nisin in Staphylococcus aureus and define a genetic basis for nisin resistance*.  
631 Antimicrob Agents Chemother, 2011. **55**(5): p. 2362-8.
- 632 34. Birben, E., et al., *Oxidative stress and antioxidant defense*. World Allergy Organ J, 2012. **5**(1): p.  
633 9-19.
- 634 35. Kajimura, J., et al., *Identification and molecular characterization of an N-acetylmuramyl-L-*  
635 *alanine amidase Sle1 involved in cell separation of Staphylococcus aureus*. Mol Microbiol, 2005.  
636 **58**(4): p. 1087-101.
- 637 36. Utaida, S., et al., *Autolytic properties of glycopeptide-intermediate Staphylococcus aureus Mu50*.  
638 Antimicrob Agents Chemother, 2006. **50**(4): p. 1541-5.
- 639 37. Cafiso, V., et al., *Modulating activity of vancomycin and daptomycin on the expression of*  
640 *autolysis cell-wall turnover and membrane charge genes in hVISA and VISA strains*. PLoS One,  
641 2012. **7**(1): p. e29573.
- 642 38. Umbarger, H.E., *Amino acid biosynthesis and its regulation*. Annu Rev Biochem, 1978. **47**: p. 532-  
643 606.
- 644 39. Zhao, J., et al., *Transcriptomic Analysis of the Activity of a Novel Polymyxin against*  
645 *Staphylococcus aureus*. mSphere, 2016. **1**(4).
- 646 40. Lee, D.S., et al., *Comparative genome-scale metabolic reconstruction and flux balance analysis of*  
647 *multiple Staphylococcus aureus genomes identify novel antimicrobial drug targets*. J Bacteriol,  
648 2009. **191**(12): p. 4015-24.
- 649 41. Thoendel, M., et al., *Peptide signaling in the staphylococci*. Chem Rev, 2011. **111**(1): p. 117-51.
- 650 42. Dunny, G.M. and B.A. Leonard, *Cell-cell communication in gram-positive bacteria*. Annu Rev  
651 Microbiol, 1997. **51**: p. 527-64.
- 652 43. Sun, F., et al., *Quorum-sensing agr mediates bacterial oxidation response via an intramolecular*  
653 *disulfide redox switch in the response regulator AgrA*. Proc Natl Acad Sci U S A, 2012. **109**(23): p.  
654 9095-100.

- 655 44. Paulander, W., et al., *The agr quorum sensing system in Staphylococcus aureus cells mediates*  
656 *death of sub-population*. BMC Res Notes, 2018. **11**(1): p. 503.
- 657 45. Fujimoto, D.F. and K.W. Bayles, *Opposing roles of the Staphylococcus aureus virulence regulators,*  
658 *Agr and Sar, in Triton X-100- and penicillin-induced autolysis*. J Bacteriol, 1998. **180**(14): p. 3724-  
659 6.
- 660 46. Schweizer, M.L., et al., *Increased mortality with accessory gene regulator (agr) dysfunction in*  
661 *Staphylococcus aureus among bacteremic patients*. Antimicrob Agents Chemother, 2011. **55**(3):  
662 p. 1082-7.
- 663 47. Darrigo, C., et al., *The Bacterial Mfd Protein Prevents DNA Damage Induced by the Host Nitrogen*  
664 *Immune Response in a NER-Independent but RecBC-Dependent Pathway*. PLoS One, 2016. **11**(10):  
665 p. e0163321.
- 666 48. Utaida, S., et al., *Genome-wide transcriptional profiling of the response of Staphylococcus aureus*  
667 *to cell-wall-active antibiotics reveals a cell-wall-stress stimulon*. Microbiology, 2003. **149**(Pt 10):  
668 p. 2719-32.
- 669 49. Michalik, S., et al., *A global Staphylococcus aureus proteome resource applied to the in vivo*  
670 *characterization of host-pathogen interactions*. Sci Rep, 2017. **7**(1): p. 9718.
- 671 50. Wang, G. and R.J. Maier, *A novel DNA-binding protein plays an important role in Helicobacter*  
672 *pylori stress tolerance and survival in the host*. J Bacteriol, 2015. **197**(5): p. 973-82.
- 673 51. Tu Quoc, P.H., et al., *Isolation and characterization of biofilm formation-defective mutants of*  
674 *Staphylococcus aureus*. Infect Immun, 2007. **75**(3): p. 1079-88.
- 675 52. Willing, S.E., et al., *Increased toxin expression in a Clostridium difficile mfd mutant*. BMC  
676 Microbiol, 2015. **15**: p. 280.
- 677 53. Ramirez-Guadiana, F.H., et al., *Transcriptional coupling of DNA repair in sporulating Bacillus*  
678 *subtilis cells*. Mol Microbiol, 2013. **90**(5): p. 1088-99.
- 679 54. Martin, H.A., et al., *Mfd protects against oxidative stress in Bacillus subtilis independently of its*  
680 *canonical function in DNA repair*. BMC Microbiol, 2019. **19**(1): p. 26.
- 681 55. Teng, X., et al., *Genome-wide consequences of deleting any single gene*. Mol Cell, 2013. **52**(4): p.  
682 485-94.
- 683 56. Waldron, D.E. and J.A. Lindsay, *Sau1: a novel lineage-specific type I restriction-modification*  
684 *system that blocks horizontal gene transfer into Staphylococcus aureus and between S. aureus*  
685 *isolates of different lineages*. J Bacteriol, 2006. **188**(15): p. 5578-85.
- 686 57. Corvaglia, A.R., et al., *A type III-like restriction endonuclease functions as a major barrier to*  
687 *horizontal gene transfer in clinical Staphylococcus aureus strains*. Proc Natl Acad Sci U S A, 2010.  
688 **107**(26): p. 11954-8.
- 689 58. Mira, N.P., et al., *Genome-wide identification of Saccharomyces cerevisiae genes required for*  
690 *tolerance to acetic acid*. Microb Cell Fact, 2010. **9**: p. 79.
- 691 59. Kawahata, M., et al., *Yeast genes involved in response to lactic acid and acetic acid: acidic*  
692 *conditions caused by the organic acids in Saccharomyces cerevisiae cultures induce expression of*  
693 *intracellular metal metabolism genes regulated by Aft1p*. FEMS Yeast Res, 2006. **6**(6): p. 924-36.
- 694 60. Kort, R., et al., *Transcriptional activity around bacterial cell death reveals molecular biomarkers*  
695 *for cell viability*. BMC Genomics, 2008. **9**: p. 590.
- 696 61. Bose, J.L., P.D. Fey, and K.W. Bayles, *Genetic tools to enhance the study of gene function and*  
697 *regulation in Staphylococcus aureus*. Appl Environ Microbiol, 2013. **79**(7): p. 2218-24.
- 698 62. Ranjit, D.K., J.L. Endres, and K.W. Bayles, *Staphylococcus aureus CidA and LrgA proteins exhibit*  
699 *holin-like properties*. J Bacteriol, 2011. **193**(10): p. 2468-76.
- 700 63. Nigam, A., S. Kumar, and H. Engelberg-Kulka, *Quorum Sensing Extracellular Death Peptides*  
701 *Enhance the Endoribonucleolytic Activities of Mycobacterium tuberculosis MazF Toxins*. MBio,  
702 2018. **9**(3).

- 703 64. Wang, X. and X. Zhao, *Contribution of oxidative damage to antimicrobial lethality*. *Antimicrob*  
704 *Agents Chemother*, 2009. **53**(4): p. 1395-402.
- 705 65. Radimer, K., et al., *Dietary supplement use by US adults: data from the National Health and*  
706 *Nutrition Examination Survey, 1999-2000*. *Am J Epidemiol*, 2004. **160**(4): p. 339-49.
- 707 66. Porta-de-la-Riva, M., et al., *Basic Caenorhabditis elegans methods: synchronization and*  
708 *observation*. *J Vis Exp*, 2012(64): p. e4019.

709

710
